# Supplementary material for: Hydrothermal synthesis of (Zr,U)SiO4: an efficient pathway to incorporate uranium into zircon
Source: Royal Society of Chemistry journal article supplement (doi:10.1039/d4dt01604a), 2024-01-01
Supplement: d4dt01604a1.pdf [file d4dt01604a1.pdf]

# Hydrothermal synthesis of (Zr,U)SiO<sub>4</sub>, an efficient pathway to incorporate uranium in zircon

Paul Estevenon<sup>1</sup>, Thomas Barral<sup>2</sup>, Arthur Avallone<sup>2</sup>, Mateo Jeffredo<sup>2</sup>, Alexis De La Hos<sup>2</sup>, Andrew Strzelecki<sup>3,4,5</sup>, Xavier Le Goff<sup>2</sup>, Stephanie Szenknect<sup>2</sup>, Kristina Kvashnina<sup>6,7</sup>, Philippe Moisy<sup>1</sup>, Renaud Podor<sup>2</sup>, Xiaofeng Guo<sup>3,4,5</sup>, Nicolas Dacheux<sup>2,\*</sup>

<sup>1</sup> CEA, DES, ISEC, DMRC, Univ Montpellier, Marcoule, France

<sup>2</sup> ICSM, Univ Montpellier, CNRS, CEA, ENSCM, Bagnols-sur-Cèze, France

<sup>3</sup> Department of Chemistry, Washington State University, Pullman, Washington 99164, United States

<sup>4</sup> Alexandra Navrotsky Institute for Experimental Thermodynamics, Washington State University, Pullman, Washington 99164, United States

<sup>5</sup> Materials Science and Engineering, Washington State University, Pullman, Washington 99164, United States

<sup>6</sup> Helmholtz Zentrum Dresden Rossendorf (HZDR), Institute of Resource Ecology, 01314 Dresden, Germany

<sup>7</sup> The Rossendorf Beamline at ESRF–The European Synchrotron, 38043 Grenoble, Cedex 9, France

## SUPPORTING INFORMATION

**Table SI 1.** Synthesis parameters for the presented (Zr,U)SiO<sub>4</sub> hydrothermal syntheses (starting pH = 3.0, T = 250°C and t = 7 days).

| <b>Label</b> | <b>Zr:U mol ratio</b> | <b>C<sub>Zr</sub><br/>(mol·L<sup>-1</sup>)</b> | <b>C<sub>U</sub><br/>(mol·L<sup>-1</sup>)</b> | <b>Final phase</b>                       |
|--------------|-----------------------|------------------------------------------------|-----------------------------------------------|------------------------------------------|
| (1)          | <b>100:0</b>          | <b>0.20</b>                                    | <b>0.00</b>                                   | ZrSiO <sub>4</sub>                       |
| (2)          | <b>90:10</b>          | <b>0.18</b>                                    | <b>0.02</b>                                   | (Zr,U)SiO <sub>4</sub>                   |
| (3)          | <b>80:20</b>          | <b>0.16</b>                                    | <b>0.04</b>                                   | (Zr,U)SiO <sub>4</sub> + UO <sub>2</sub> |
| (4)          | <b>70:30</b>          | <b>0.14</b>                                    | <b>0.06</b>                                   | (Zr,U)SiO <sub>4</sub> + UO <sub>2</sub> |
| (5)          | <b>60:40</b>          | <b>0.12</b>                                    | <b>0.08</b>                                   | (Zr,U)SiO <sub>4</sub> + UO <sub>2</sub> |
| (6)          | <b>50:50</b>          | <b>0.10</b>                                    | <b>0.10</b>                                   | (Zr,U)SiO <sub>4</sub> + UO <sub>2</sub> |
| (7)          | <b>40:60</b>          | <b>0.08</b>                                    | <b>0.12</b>                                   | (Zr,U)SiO <sub>4</sub> + UO <sub>2</sub> |
| (8)          | <b>30:70</b>          | <b>0.06</b>                                    | <b>0.14</b>                                   | (Zr,U)O <sub>2</sub>                     |
| (9)          | <b>20:80</b>          | <b>0.04</b>                                    | <b>0.16</b>                                   | (Zr,U)O <sub>2</sub>                     |
| (10)         | <b>90:10</b>          | <b>0.02</b>                                    | <b>0.18</b>                                   | (Zr,U)O <sub>2</sub>                     |

**Table SI 2.** Unit cell and volume of the zircon-type phase obtained by Rietveld refinements performed from PXRD patterns of pristine (Zr,U)SiO<sub>4</sub> solid solutions prepared under hydrothermal conditions (T = 250°C, 7 days, pH = 3.0) starting with Zr + U and silicate concentrations of 0.2 mol·L<sup>-1</sup> with different chemical compositions.

|     | $\frac{U}{Zr+U}$ | Pristine samples |              |                            | Purified samples |              |                            | Annealed at 1200°C |              |                            |
|-----|------------------|------------------|--------------|----------------------------|------------------|--------------|----------------------------|--------------------|--------------|----------------------------|
|     |                  | <i>a</i> (Å)     | <i>c</i> (Å) | <i>V</i> (Å <sup>3</sup> ) | <i>a</i> (Å)     | <i>c</i> (Å) | <i>V</i> (Å <sup>3</sup> ) | <i>a</i> (Å)       | <i>c</i> (Å) | <i>V</i> (Å <sup>3</sup> ) |
| (1) | 0                | 6.6103(5)        | 5.9768(4)    | 261.16(6)                  | 6.6103(5)        | 5.9768(4)    | 261.16(6)                  | 6.6025(5)          | 5.9770(5)    | 260.55(6)                  |
| (2) | 0.1              | 6.6306(6)        | 5.9927 (6)   | 263.47(8)                  | 6.6306(6)        | 5.9927 (6)   | 263.47(8)                  | 6.631(1)           | 5.999(1)     | 263.8(2)                   |
| (3) | 0.2              | 6.7341(5)        | 6.0556(6)    | 274.61(7)                  | 6.725(2)         | 6.049(2)     | 273.6(2)                   | 6.677(2)           | 6.033(2)     | 268.9(3)                   |
| (4) | 0.3              | 6.7468(7)        | 6.0648(7)    | 276.06(9)                  | 6.740(2)         | 6.063(2)     | 275.4(2)                   | 6.723(1)           | 6.063(1)     | 274.0(1)                   |
| (5) | 0.4              | 6.7697(5)        | 6.0796(5)    | 278.62(7)                  | 6.761(1)         | 6.078(1)     | 277.8(1)                   | 6.753(1)           | 6.085(1)     | 277.5(2)                   |
| (6) | 0.5              | 6.7997(9)        | 6.099(1)     | 282.0(1)                   | 6.793(3)         | 6.098(3)     | 281.4(4)                   | 6.782(1)           | 6.105(1)     | 280.8(1)                   |
| (7) | 0.6              | 6.8343(7)        | 6.1174(7)    | 285.73(9)                  | 6.827(2)         | 6.117(2)     | 285.1(3)                   | 6.807(1)           | 6.122(1)     | 283.6(1)                   |

**Table SI 3.** Unit cell and volume of oxide phases obtained from PXRD patterns of pristine (Zr,U)SiO<sub>4</sub> solid solutions prepared under hydrothermal conditions (T = 250°C, 7 days, pH = 3.0) starting with Zr + U and silicate concentrations of 0.2 mol·L<sup>-1</sup> with different chemical compositions.

|      | $\frac{U}{Zr+U}$ | UO <sub>2+x</sub> |                            | (Zr,U)O <sub>2+x</sub> |                            |
|------|------------------|-------------------|----------------------------|------------------------|----------------------------|
|      |                  | <i>a</i> (Å)      | <i>V</i> (Å <sup>3</sup> ) | <i>a</i> (Å)           | <i>V</i> (Å <sup>3</sup> ) |
| (3)  | 0.2              | 5.4703(3)         | 163.69(3)                  | -                      | -                          |
| (4)  | 0.3              | 5.467(1)          | 163.4(1)                   | -                      | -                          |
| (5)  | 0.4              | 5.4698(5)         | 163.65(4)                  | 5.437(1)               | 160.7(1)                   |
| (6)  | 0.5              | 5.4636(7)         | 163.09(6)                  | 5.353(5)               | 153.4(5)                   |
| (7)  | 0.6              | 5.460(2)          | 162.8(2)                   | 5.385(1)               | 156.2(1)                   |
| (8)  | 0.7              | 5.463(1)          | 163.06(9)                  | 5.386(2)               | 156.3(2)                   |
| (9)  | 0.8              | 5.4588(5)         | 162.66(5)                  | 5.419(2)               | 159.1(2)                   |
| (10) | 0.9              | 5.464(2)          | 163.1(2)                   | 5.445(1)               | 161.4(1)                   |

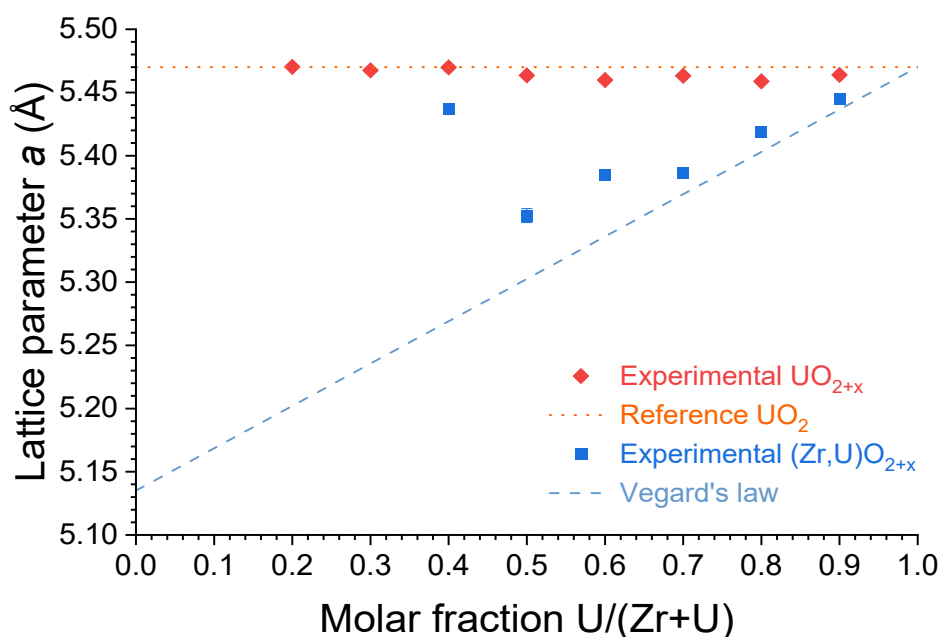

**Figure SI 1.** Unit cell parameters  $a$  obtained by Rietveld refinements for the oxide phases performed from PXRD patterns of pristine  $(Zr,U)SiO_4$  solid solutions prepared under hydrothermal conditions ( $T = 250^\circ\text{C}$ , 7 days,  $\text{pH} = 3.0$ ) starting with  $Zr + U$  and silicate concentrations of  $0.2 \text{ mol}\cdot\text{L}^{-1}$  with different chemical compositions.

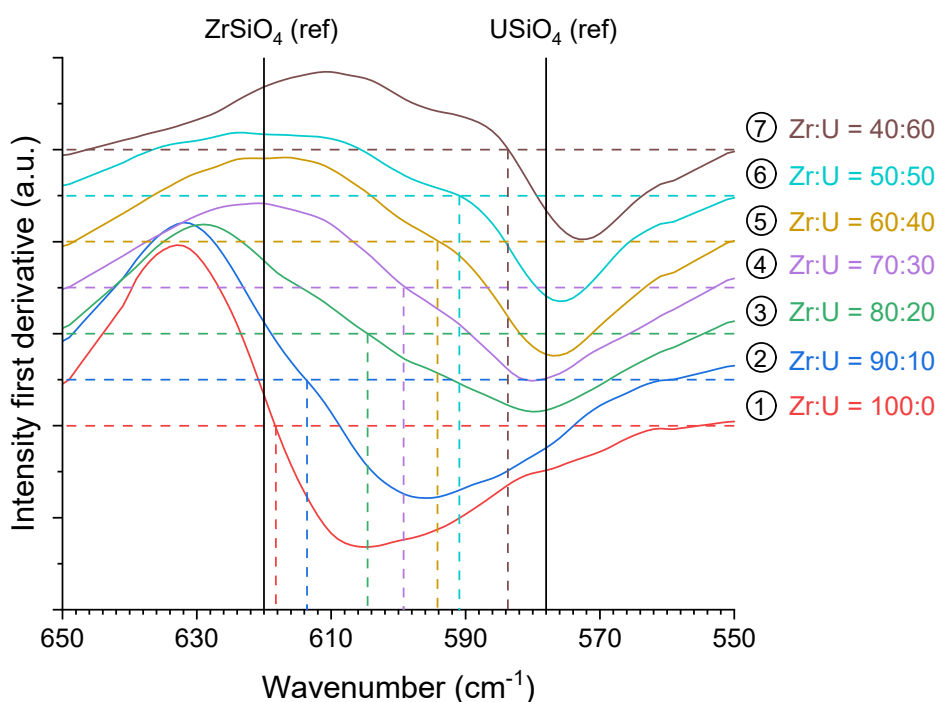

**Figure SI 2.** First derivative of the infrared spectra, focussed on the  $SiO_4$  group  $\nu_4$  band, recorded for pristine  $(Zr,U)SiO_4$  solid solutions with different chemical compositions prepared under hydrothermal conditions without purification ( $T = 250^\circ\text{C}$ , 7 days,  $\text{pH} = 3.0$ ) from  $Zr + U$  and silicate concentrations of  $0.2 \text{ mol}\cdot\text{L}^{-1}$  for  $Zr:U = 100:0$  (1),  $90:10$  (2),  $80:20$  (3),  $70:30$  (4),  $60:40$  (5),  $50:50$  (6),  $40:60$  (7),  $30:70$  (8),  $20:80$  (9) and  $10:90$  (10). The reference  $ZrSiO_4$   $\nu_4$  band position has been taken from ref. <sup>91</sup>

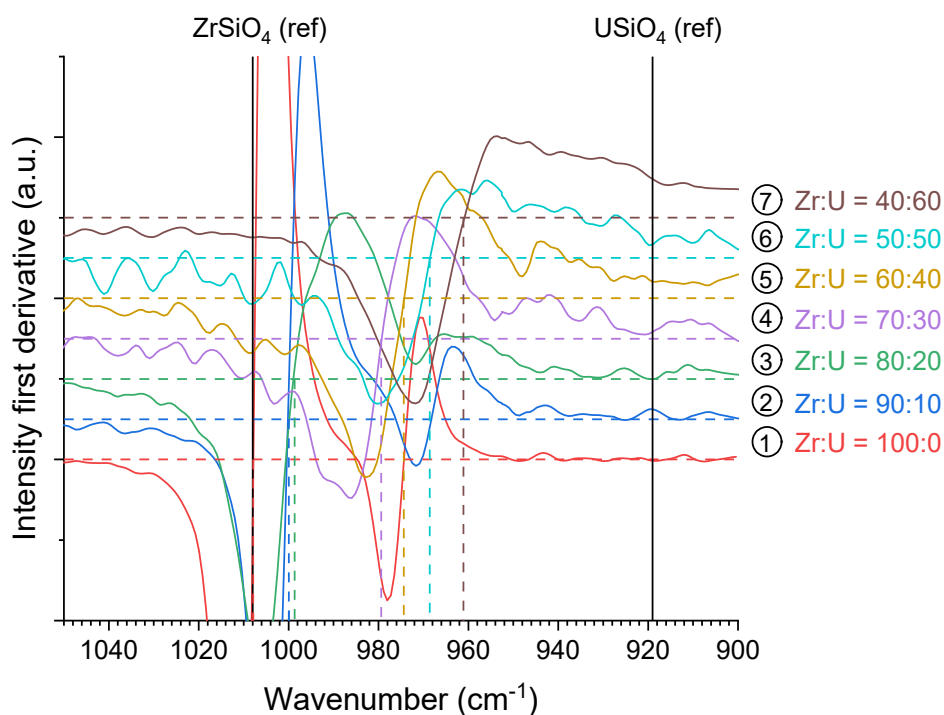

**Figure SI 3.** First derivative of the Raman spectra, focussed on the  $\text{SiO}_4$  group  $\nu_3$  band, recorded for pristine  $(\text{Zr,U})\text{SiO}_4$  solid solutions with different chemical compositions prepared under hydrothermal conditions without purification ( $T = 250^\circ\text{C}$ , 7 days,  $\text{pH} = 3.0$ ) from  $\text{Zr} + \text{U}$  and silicate concentrations of  $0.2 \text{ mol}\cdot\text{L}^{-1}$  for  $\text{Zr}:\text{U} = 100:0$  (1),  $90:10$  (2),  $80:20$  (3),  $70:30$  (4),  $60:40$  (5),  $50:50$  (6),  $40:60$  (7),  $30:70$  (8),  $20:80$  (9) and  $10:90$  (10). Reference  $\text{ZrSiO}_4$  and  $\text{USiO}_4$   $\nu_3$  band positions taken from ref<sup>93</sup>.

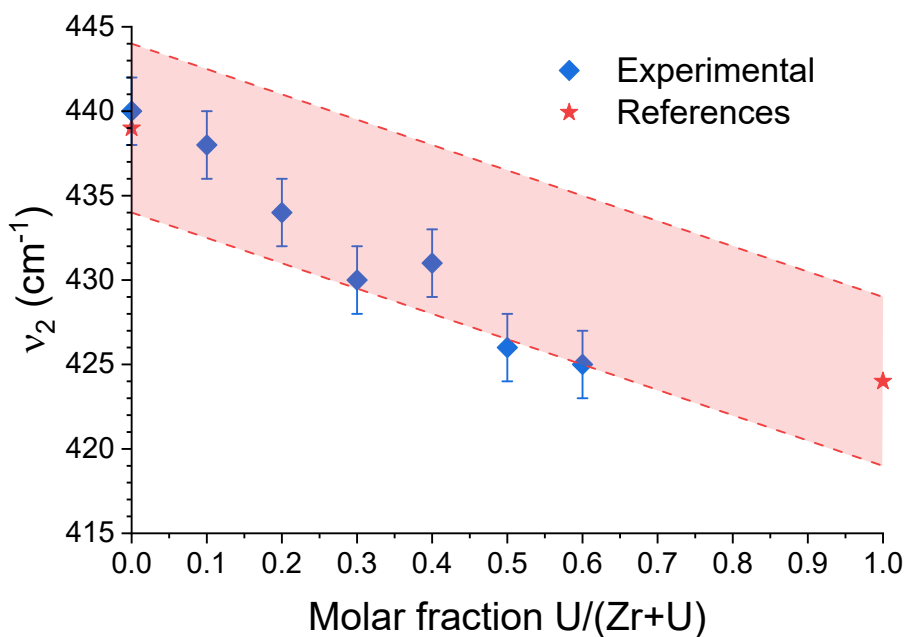

**Figure SI 4.** Position of the  $\nu_2$  band in Raman spectroscopy plotted as a function of the expected  $U/(Zr+U)$  molar fraction for pristine  $(Zr,U)SiO_4$  solid solutions with different chemical compositions prepared under hydrothermal conditions ( $T = 250^\circ C$ , 7 days,  $pH = 3.0$ ) starting from  $Zr + U$  and silicate concentrations of  $0.2 \text{ mol}\cdot\text{L}^{-1}$  for  $Zr:U = 100:0$  (1),  $90:10$  (2),  $80:20$  (3),  $70:30$  (4),  $60:40$  (5),  $50:50$  (6) and  $40:60$  (7). Reference  $ZrSiO_4$  and  $USiO_4$   $\nu_2$  band positions taken from ref<sup>93</sup>. The shaded area corresponds to the expected linear variation of the  $\nu_2$  band of the  $SiO_4$  group in Raman spectroscopy, based on reference values reported in the literature, with a confidence interval of  $5 \text{ cm}^{-1}$ .

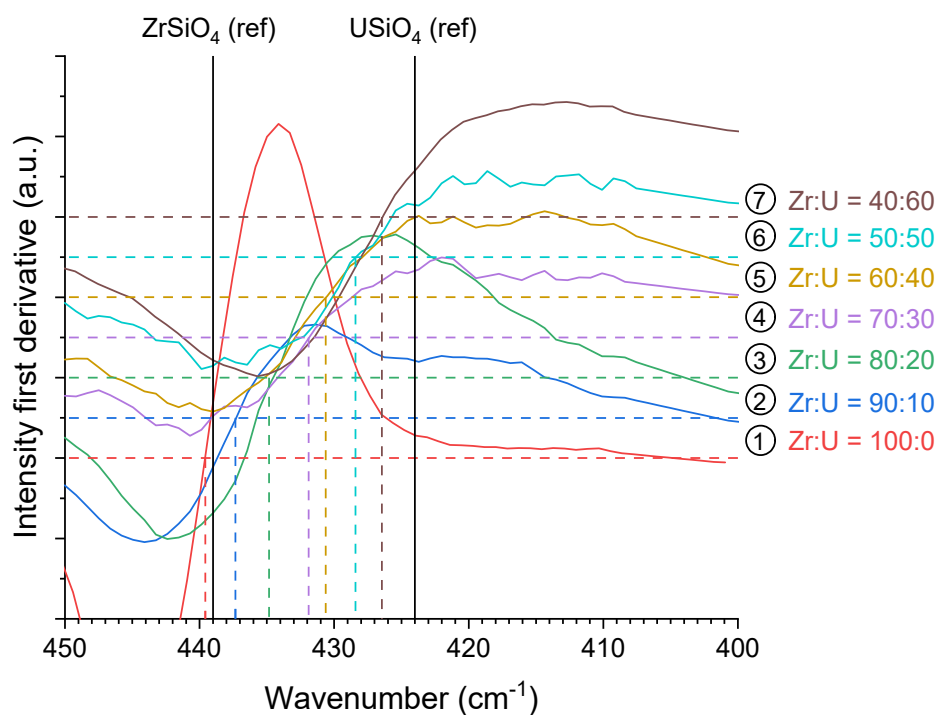

**Figure SI 5.** First derivative of the Raman spectra, focussed on the  $\text{SiO}_4$  group  $\nu_2$  band, recorded for pristine  $(\text{Zr,U})\text{SiO}_4$  solid solutions with different chemical compositions prepared under hydrothermal conditions without purification ( $T = 250^\circ\text{C}$ , 7 days,  $\text{pH} = 3.0$ ) from  $\text{Zr} + \text{U}$  and silicate concentrations of  $0.2 \text{ mol}\cdot\text{L}^{-1}$  for  $\text{Zr}:\text{U} = 100:0$  (1),  $90:10$  (2),  $80:20$  (3),  $70:30$  (4),  $60:40$  (5),  $50:50$  (6),  $40:60$  (7),  $30:70$  (8),  $20:80$  (9) and  $10:90$  (10). Reference  $\text{ZrSiO}_4$  and  $\text{USiO}_4$   $\nu_2$  band positions taken from ref<sup>93</sup>.

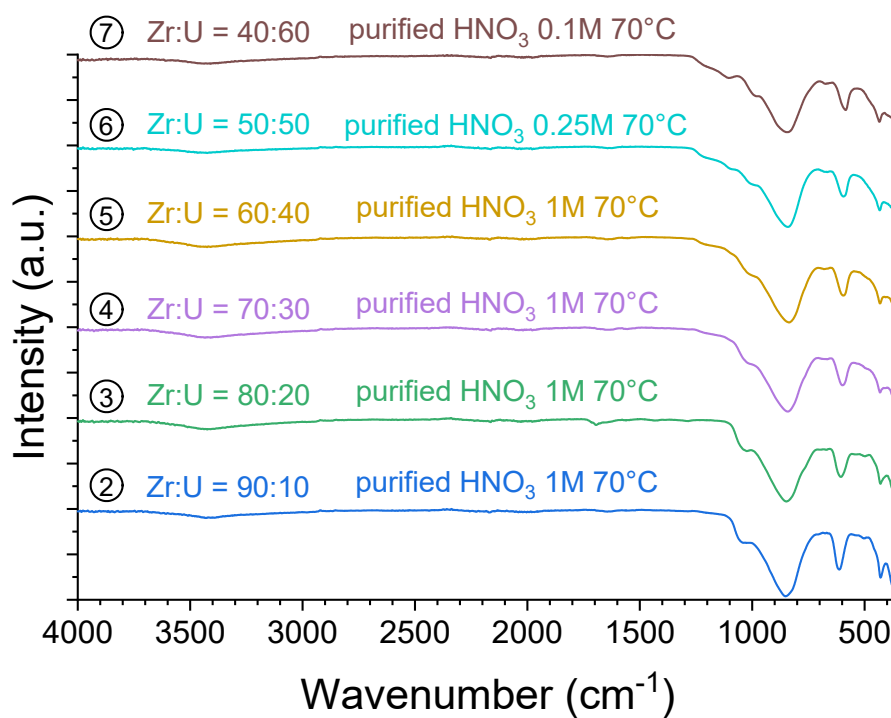

**Figure SI 6.** Infrared spectra recorded for purified (Zr,U)SiO<sub>4</sub> solid solutions of different chemical compositions prepared under hydrothermal conditions (T = 250°C, 7 days, pH = 3.0) starting with Zr + U and silicate concentrations of 0.2 mol·L<sup>-1</sup> for Zr:U = 90:10 (2), 80:20 (3), 70:30 (4), 60:40 (5), 50:50 (6), 40:60 (7) and washed in nitric media.



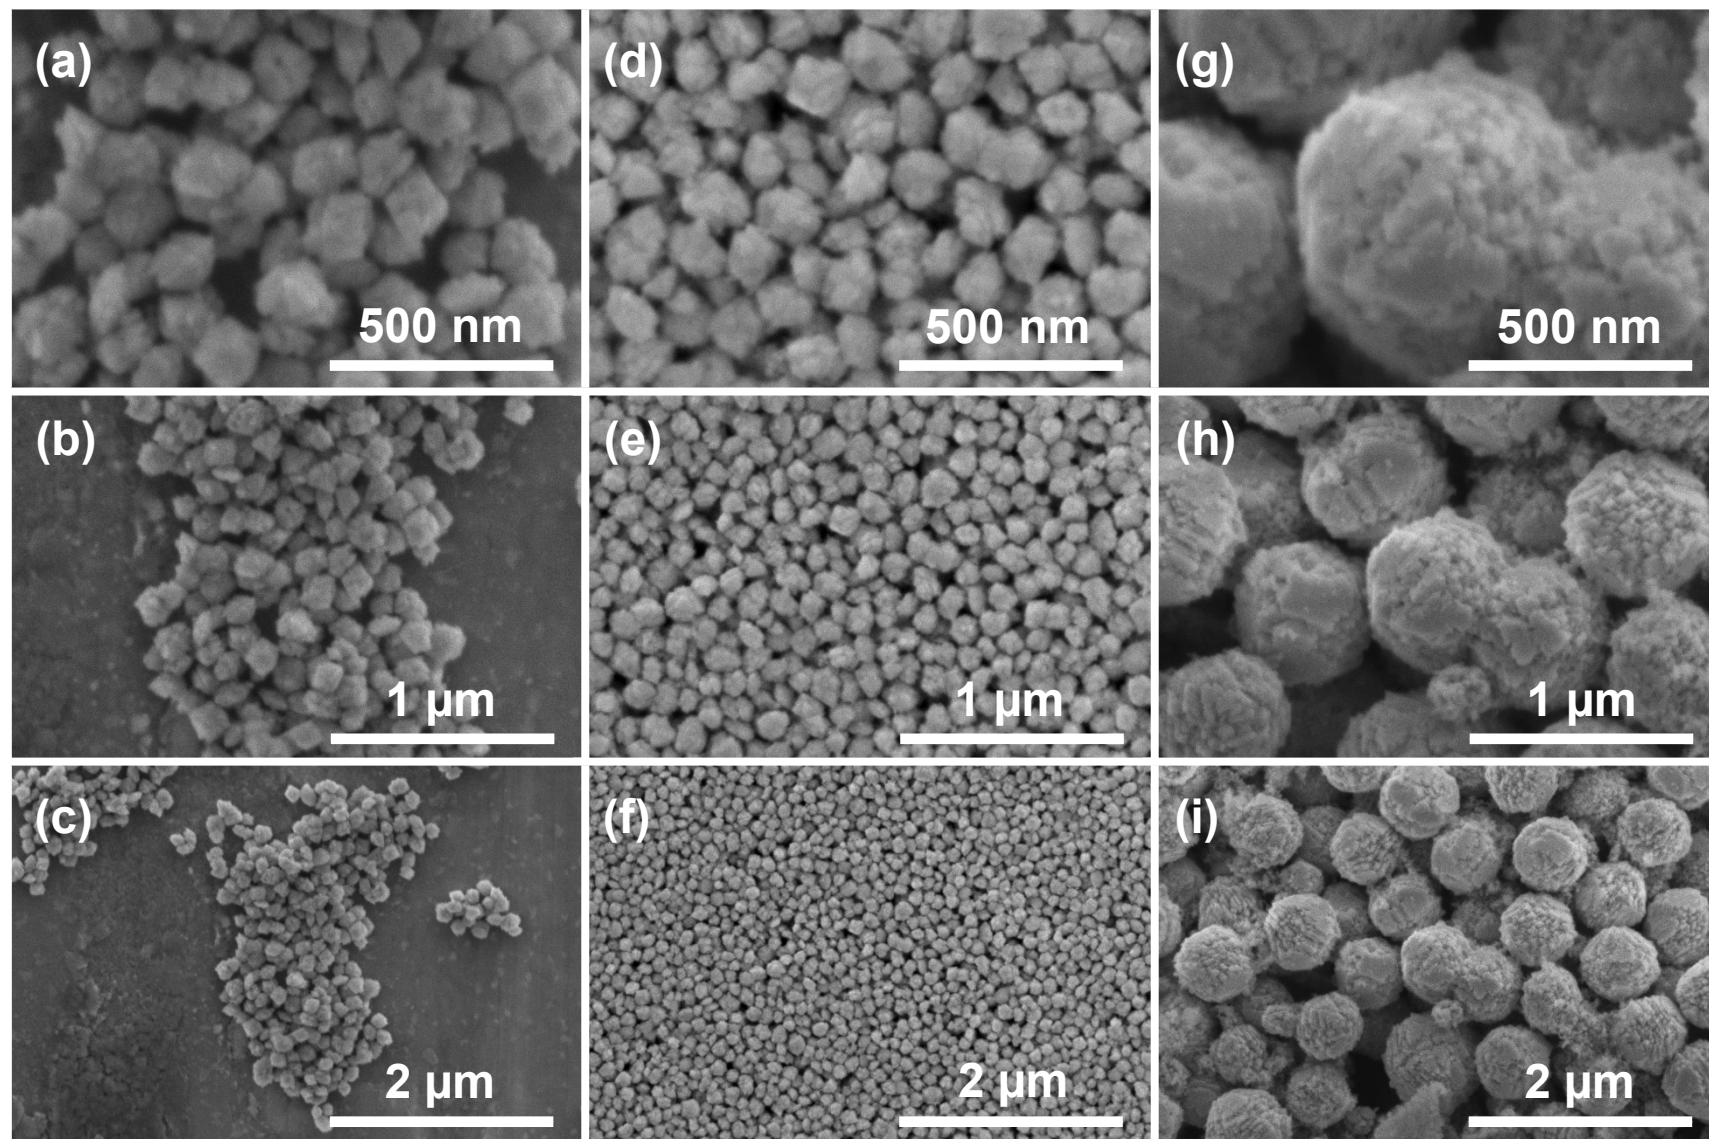

**Figure SI 7.** SEM micrographs of purified  $(\text{Zr,U})\text{SiO}_4$  solid solutions prepared under hydrothermal conditions ( $T = 250^\circ\text{C}$ , 7 days,  $\text{pH} = 3.0$ ) starting with Zr + U and silicate concentrations of  $0.2 \text{ mol}\cdot\text{L}^{-1}$  for Zr:U = 80:20 (3) (a, b and c), 60:40 (5) (d, e and f) and 40:60 (7) (g, h and i) and washed in nitric media.

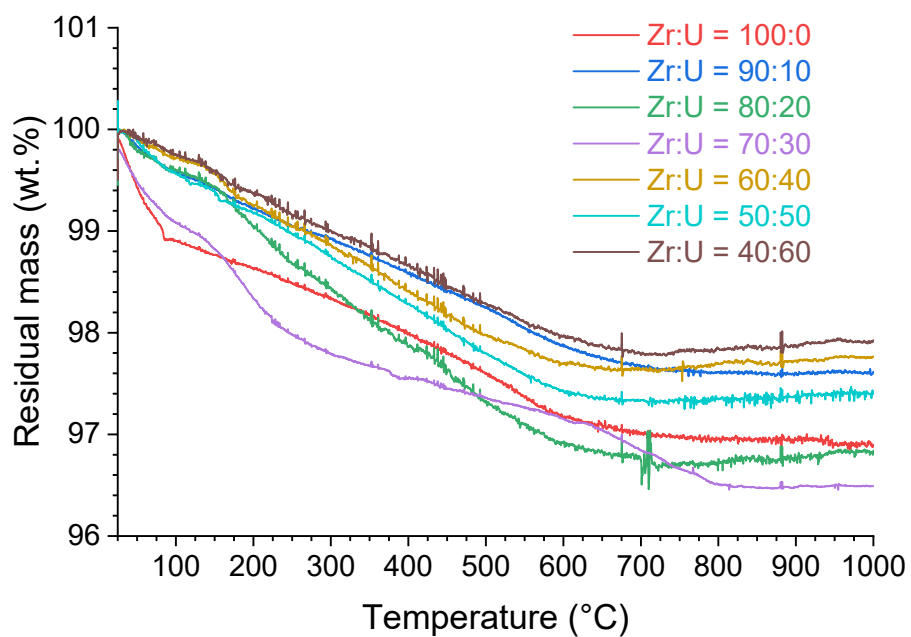

**Figure SI 8.** Results of Thermogravimetric analyses recorded in inert atmosphere (Ar) for purified  $(\text{Zr,U})\text{SiO}_4$  solid solutions of different chemical compositions prepared under hydrothermal conditions ( $T = 250^\circ\text{C}$ , 7 days,  $\text{pH} = 3.0$ ) starting with Zr + U and silicate concentrations of  $0.2 \text{ mol}\cdot\text{L}^{-1}$  for Zr:U = 90:10 (2), 80:20 (3), 70:30 (4), 60:40 (5), 50:50 (6), 40:60 (7) and after washing in nitric media.

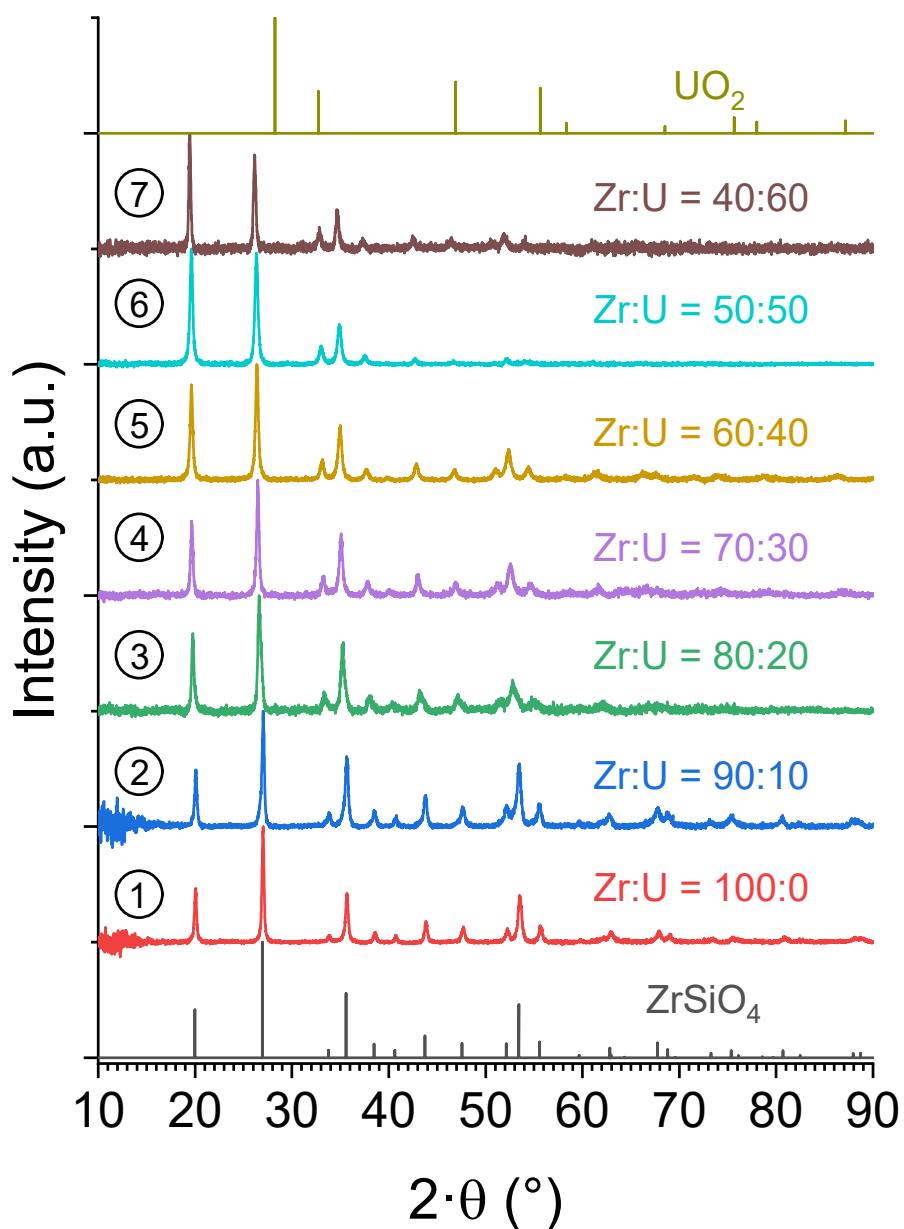

**Figure SI 9.** PXRD patterns recorded for purified  $(\text{Zr,U})\text{SiO}_4$  solid solutions heated at  $1000^\circ\text{C}$  under argon atmosphere with different chemical compositions prepared under hydrothermal conditions ( $T = 250^\circ\text{C}$ , 7 days,  $\text{pH} = 3.0$ ) starting with Zr + U and silicate concentrations of  $0.2 \text{ mol}\cdot\text{L}^{-1}$  for Zr:U = 90:10 (2), 80:20 (3), 70:30 (4), 60:40 (5), 50:50 (6), 40:60 (7). Bragg positions of the characteristic peaks of  $\text{ZrSiO}_4$  and  $\text{UO}_2$  were extracted from Refs <sup>89</sup> and <sup>94</sup>.

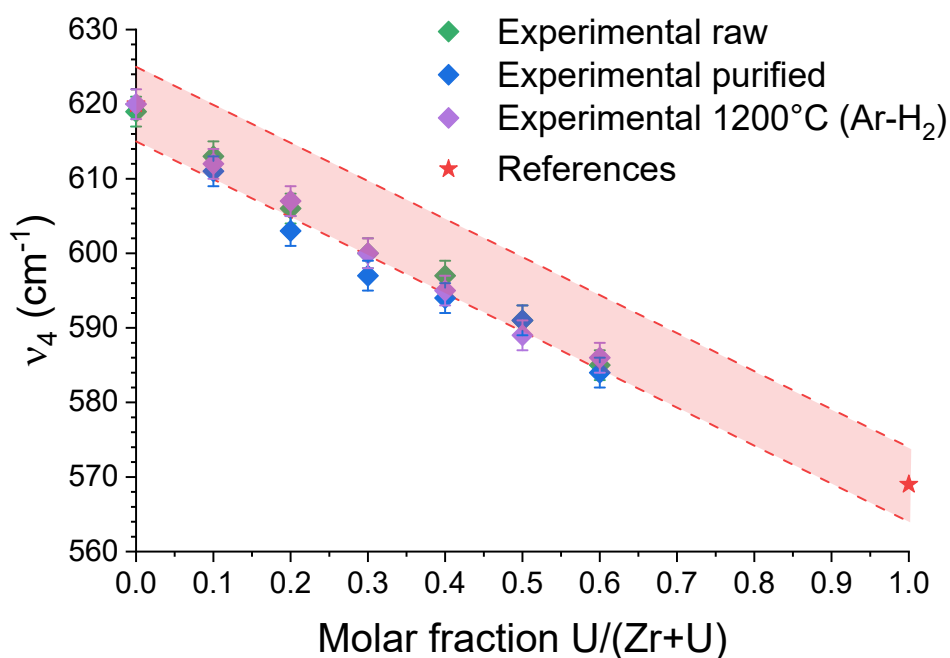

**Figure SI 10.** Position of the  $\nu_4$  band in infrared spectroscopy plotted as a function of the expected  $U/(Zr+U)$  molar fraction for pristine, purified and calcined  $(Zr,U)SiO_4$  solid solutions  $(Zr,U)SiO_4$  solid solutions with different chemical compositions prepared under hydrothermal conditions ( $T = 250^\circ C$ , 7 days,  $pH = 3.0$ ). The reference  $ZrSiO_4$   $\nu_4$  band position has been taken from ref. <sup>91</sup> The shaded area corresponds to the expected linear variation of the  $\nu_4$  band of the  $SiO_4$  group in IR spectroscopy, based on reference values reported in the literature, with a confidence interval of  $5\text{ cm}^{-1}$ .

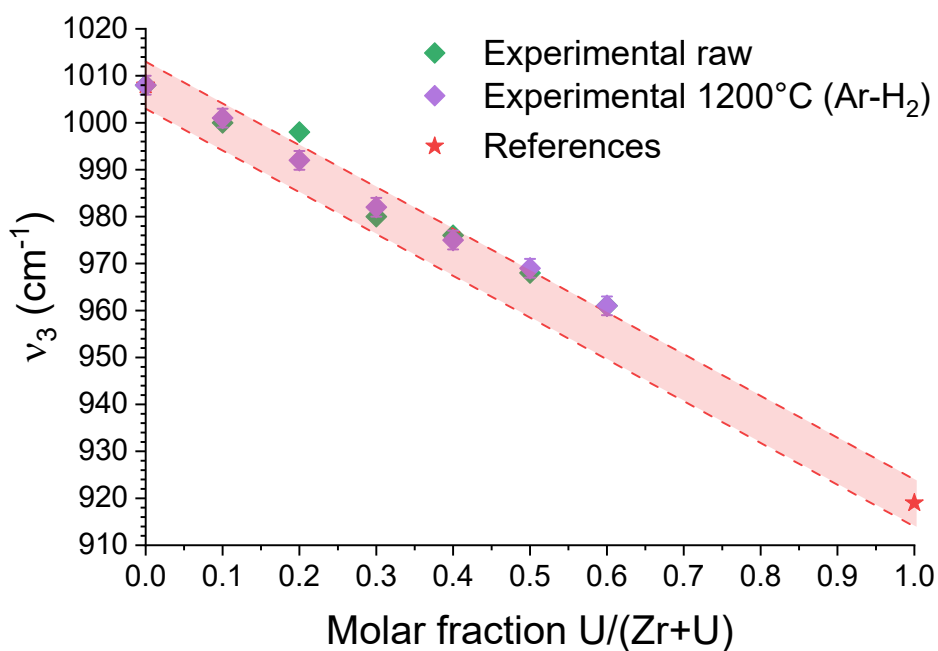

**Figure SI 11.** Position of the  $\nu_3$  band in Raman spectroscopy plotted as a function of the expected  $U/(Zr+U)$  molar fraction for pristine and calcined  $(Zr,U)SiO_4$  solid solutions  $(Zr,U)SiO_4$  solid solutions with different chemical compositions

prepared under hydrothermal conditions ( $T = 250^{\circ}\text{C}$ , 7 days,  $\text{pH} = 3.0$ ). Reference  $\text{ZrSiO}_4$  and  $\text{USiO}_4$   $\nu_3$  band positions taken from ref <sup>93</sup>. The shaded area corresponds to the expected linear variation of the  $\nu_3$  band of the  $\text{SiO}_4$  group in Raman spectroscopy, based on reference values reported in the literature, with a confidence interval of  $5\text{ cm}^{-1}$ .

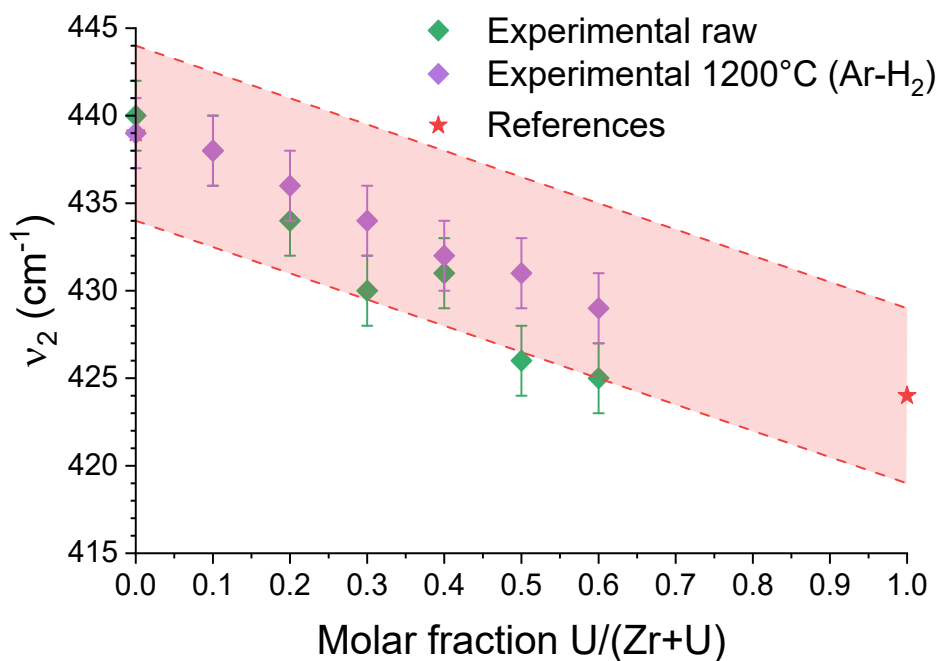

**Figure SI 12.** Position of the  $\nu_2$  band in Raman spectroscopy plotted as a function of the expected  $\text{U}/(\text{Zr}+\text{U})$  molar fraction for pristine and calcined  $(\text{Zr},\text{U})\text{SiO}_4$  solid solutions  $(\text{Zr},\text{U})\text{SiO}_4$  solid solutions with different chemical compositions prepared under hydrothermal conditions ( $T = 250^{\circ}\text{C}$ , 7 days,  $\text{pH} = 3.0$ ). Reference  $\text{ZrSiO}_4$  and  $\text{USiO}_4$   $\nu_2$  band positions taken from ref <sup>93</sup>. The shaded area corresponds to the expected linear variation of the  $\nu_2$  band of the  $\text{SiO}_4$  group in Raman spectroscopy, based on reference values reported in the literature, with a confidence interval of  $5\text{ cm}^{-1}$ .
